# Supplementary material
Source: PubMed Central journal article supplement (PMC7049149)
Supplement: pnas.1917298117.sapp.pdf [file pnas.1917298117.sapp.pdf]

## Supplementary Information for

Title: PD-1+ stem-like CD8 T cells are resident in lymphoid tissues during persistent LCMV infection

Se Jin Im<sup>a,b</sup>, Bogumila T Konieczny<sup>a,b</sup>, William H. Hudson<sup>a,b</sup>, David Masopust<sup>c,d</sup> and Rafi Ahmed<sup>a,b,1</sup>

<sup>a</sup>Emory Vaccine Center, Emory University School of Medicine, Atlanta, GA 30322, USA

<sup>b</sup>Department of Microbiology and Immunology, Emory University School of Medicine, Atlanta, GA 30322, USA

<sup>c</sup>Department of Microbiology and Immunology, University of Minnesota, Minneapolis, MN 55455, USA

<sup>d</sup>Center for Immunology, University of Minnesota, Minneapolis, MN 55455, USA

<sup>1</sup>Corresponding author: Rafi Ahmed, Ph.D.

Emory Vaccine Center, Emory University School of Medicine  
1510 Clifton Rd Rm G211, Atlanta GA, 30322, USA

Phone: 404-727-3571

Email: [rahmed@emory.edu](mailto:rahmed@emory.edu)

### This PDF file includes:

Figs. S1 to S2

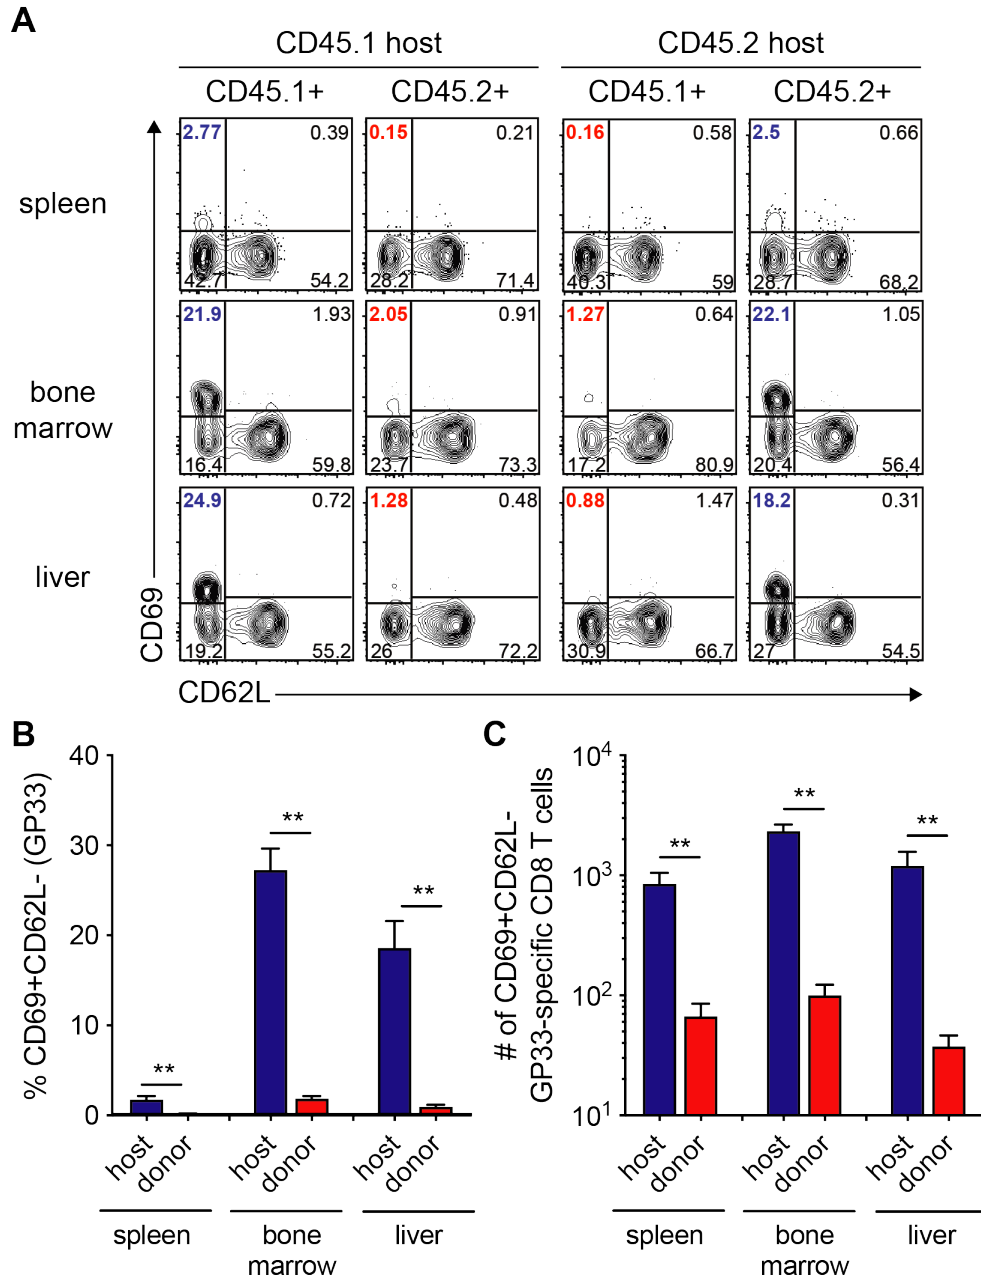

**Fig. S1. Residency of CD69+CD62L- virus-specific memory CD8 T cells in acute LCMV infection.** Parabiosis surgery was performed as described in Fig. 2E. (A-C) Representative FACS plots (A) and summary graphs (B-C) showing the proportion (B) and number (C) of CD69+CD62L- CD8 T cells in the indicated tissues of LCMV immune parabionts. Data are combined results of 3 independent experiments (total n=7) and mean and s.e.m. are shown. Student's t-test, where \*\* p<0.01.

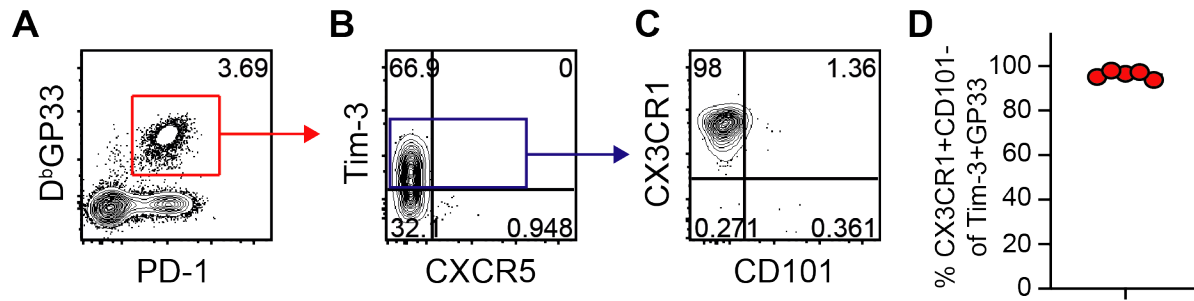

**Fig. S2. Circulation of PD-1+Tim-3+CX3CR1+CD101- CD8 T cells during chronic LCMV infection model with CD4 T cell help.** Mice were infected with LCMV clone 13 strain without any depletion of CD4 T cells. (A-B) Representative FACS plots of GP33-specific CD8 T cells 41 days p.i. in the blood of chronically infected mice (A) and their CXCR5 and Tim-3 expression (B). (C-D) Representative FACS plots of CD101 and CX3CR1 expression on PD-1+Tim-3+ GP33-specific CD8 T cells and a summary graph (D) showing the proportion of CX3CR1+CD101- CD8 T cells among Tim-3+ GP33-specific CD8 T cells. Graphs show the mean and s.e.m.
